# Supplementary material for: Endoplasmic Reticulum Calcium Regulates the Retrotranslocation of Trypanosoma Cruzi Calreticulin to the Cytosol
Source: PubMed Central journal article supplement (PMC2950133; doi:10.1371/journal.pone.0013141), 2010-10-05
Supplement: pone.0013141.s001.pdf [file pone.0013141.s001.pdf]

| Primer | Sequence                                                       | Restriction sites | Purpose                                                                                                                                                        |
|--------|----------------------------------------------------------------|-------------------|----------------------------------------------------------------------------------------------------------------------------------------------------------------|
| 1      | 5'-GACGAAAAGGGTGACCGTGATAAGGAG-3'                              |                   | Generate KDEL. Used with primer 2 and T4 polymerase. The fragment generated was cloned in pBLUESCRIPT digested with Xho I-Hinc II                              |
| 2      | 5'-CCGCTCGAGTTACAAATCCTCCTTATC-3'                              | XhoI              | see primer 1                                                                                                                                                   |
| 3      | 5'-CCC <u>AAGCTT</u> ATCTTTTACCCA 3'                           | HindIII           | Amplification of 3 X HA tag from pSLF-72 vector. Used with primer 4. The product was cloned in pBLUESCRIPT:KDEL digested with Hind III-EcoR V                  |
| 4      | 5'-CCGGGTCGAGATATCAGCGTA-3'                                    | EcoR V            | see primer 3                                                                                                                                                   |
| 5      | 5'-CCC <u>AAGCTT</u> TTCCAACCTCTTCTTC-3'                       | Hind III          | Amplification of CRT. Used with primer 7. The fragment was cloned in pBLUESCRIPT:HA-KDEL digested with Hind III-EcoR I                                         |
| 6      | 5'-CCC <u>AAGCTT</u> TCCGCCTTCTTCAGG-3'                        | Hind III          | Amplification of CRT-ΔC. Used with primer 7. The fragment was cloned in pBLUESCRIPT:HA-KDEL digested with Hind III-EcoR I                                      |
| 7      | 5'-GGAATTCATGCGTGACAGCA-3'                                     | EcoR I            | see primer 5                                                                                                                                                   |
| 8      | 5'-CCC <u>AAGCTT</u> TTCCAACCTCTTCTTC-3'                       | Hind III          | Amplification of CRT-C. Used with primer 9. The product was cloned in pBLUESCRIPT:KEDL digested with EcoR V-Hind III                                           |
| 9      | 5'-ATCGGCCTGAAGAAAGCG-3'                                       |                   | see primer 8                                                                                                                                                   |
| 10     | 5'-GGAATTCATGGTGAGCAAG-3'                                      | EcoR I            | Amplification of GFP. Used with primer 11. The fragment was cloned in pBLUESCRIPT: KEDL or pBLUESCRIPT:CRT-C-KDEL, both previously digested with EcoR I-EcoR V |
| 11     | 5'-CTTGACAGCTCGTCCATC-3'                                       |                   | see primer 10                                                                                                                                                  |
| 12     | 5'-GGCCTTGCGACACTGTCAGCCGTGCA<br>CGGCACGGTGAGCAAGGGCGAGGAGC-3' |                   | Introduction of signal peptide by partial annealing with templates pBLUESCRIPT:GFP-KEDL or pBLUESCRIPT:GFP-CRT-C-KEDL. Used with primer 13                     |
| 13     | 5'-CAAAAGGGCACAGAAAAAATTGCTG<br>CACGCATGAATTCCTGCAGCCCGGG-3'   |                   | see primer 12                                                                                                                                                  |
